# Supplementary material for: Downscaling Switzerland Land Use/Land Cover Data Using Nearest Neighbors and an Expert System
Source: MDPI journal article supplement (doi:10.3390/land11050615), 2022-04-21
Supplement: s1 [file land-1629517-supplementary.pdf › land-1629517-supplementary.pdf]

## Article

# Downscaling Switzerland Land Use/Land Cover Data Using Nearest Neighbors and an Expert System

Gregory Giuliani <sup>1,2,\*</sup>, Denisa Rodila <sup>1,2</sup>, Nathan Külling <sup>1</sup>, Ramona Maggini <sup>3</sup> and Anthony Lehmann <sup>1</sup>

<sup>1</sup> EnviroSPACE Laboratory, Institute for Environmental Sciences, University of Geneva, Bd. Carl-Vogt 66, 1205 Geneva, Switzerland; denisa.rodila@unepgrid.ch (D.R.); nathan.kuelling@unige.ch (N.K.); anthony.lehmann@unige.ch (A.L.)

<sup>2</sup> GRID-Geneva, Institute for Environmental Sciences, University of Geneva, Bd. Carl-Vogt 66, 1205 Geneva, Switzerland

<sup>3</sup> Agroscope, via A Ramél 18, CH-6593 Cadenazzo, Switzerland; ramona.maggini@agroscope.admin.ch

\* Correspondence: gregory.giuliani@unige.ch

**Abstract:** High spatial and thematic resolution of Land Use/Cover (LU/LC) maps are central for accurate watershed analyses, improved species, and habitat distribution modelling as well as ecosystem services assessment, robust assessments of LU/LC changes and calculation of indices. Downscaled LU/LC maps for Switzerland were obtained for three time periods by blending two inputs: the Swiss topographic base map at a 1:25,000 scale and the national LU/LC statistics obtained from aerial photointerpretation on a 100m regular lattice of points. The spatial resolution of the resulting LU/LC map was improved by a factor of 16 to reach a resolution of 25m, while the thematic resolution was increased from 29 (in the base map) to 62 land use categories. The method combines a simple inverse distance spatial weighting of 36 nearest neighbours' information and an expert system of correspondence between input base map categories and possible output LU/LC types. The developed algorithm, written in Python, reads and writes gridded layers of more than 64 million pixels. Given the size of the analysed area, a High-Performance Computing (HPC) cluster was used to parallelize the data and the analysis and to obtain results more efficiently. The method presented in this study is a generalizable approach that can be used to downscale different types of geographic information.

**Keywords:** land cover; land use change; downscaling approach; Switzerland; geographic information system; aerial photo interpretation; topographic map; inverse distance weighting; expert system

**Citation:** Giuliani, G.; Rodila, D.; Külling, N.; Maggini, R.; Lehmann, A. Downscaling Switzerland Land Use/Land Cover Data Using Nearest Neighbors and an Expert System. *Land* **2022**, *11*, 615. <https://doi.org/10.3390/land11050615>

Academic Editors: Víctor Hugo González-Jaramillo and Antonio Novelli

Received: 22 February 2022

Accepted: 20 April 2022

Published: 21 April 2022

**Publisher's Note:** MDPI stays neutral with regard to jurisdictional claims in published maps and institutional affiliations.

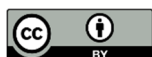

**Copyright:** © 2022 by the authors. Licensee MDPI, Basel, Switzerland. This article is an open access article distributed under the terms and conditions of the Creative Commons Attribution (CC BY) license (<https://creativecommons.org/licenses/by/4.0/>).

## Supplementary Material

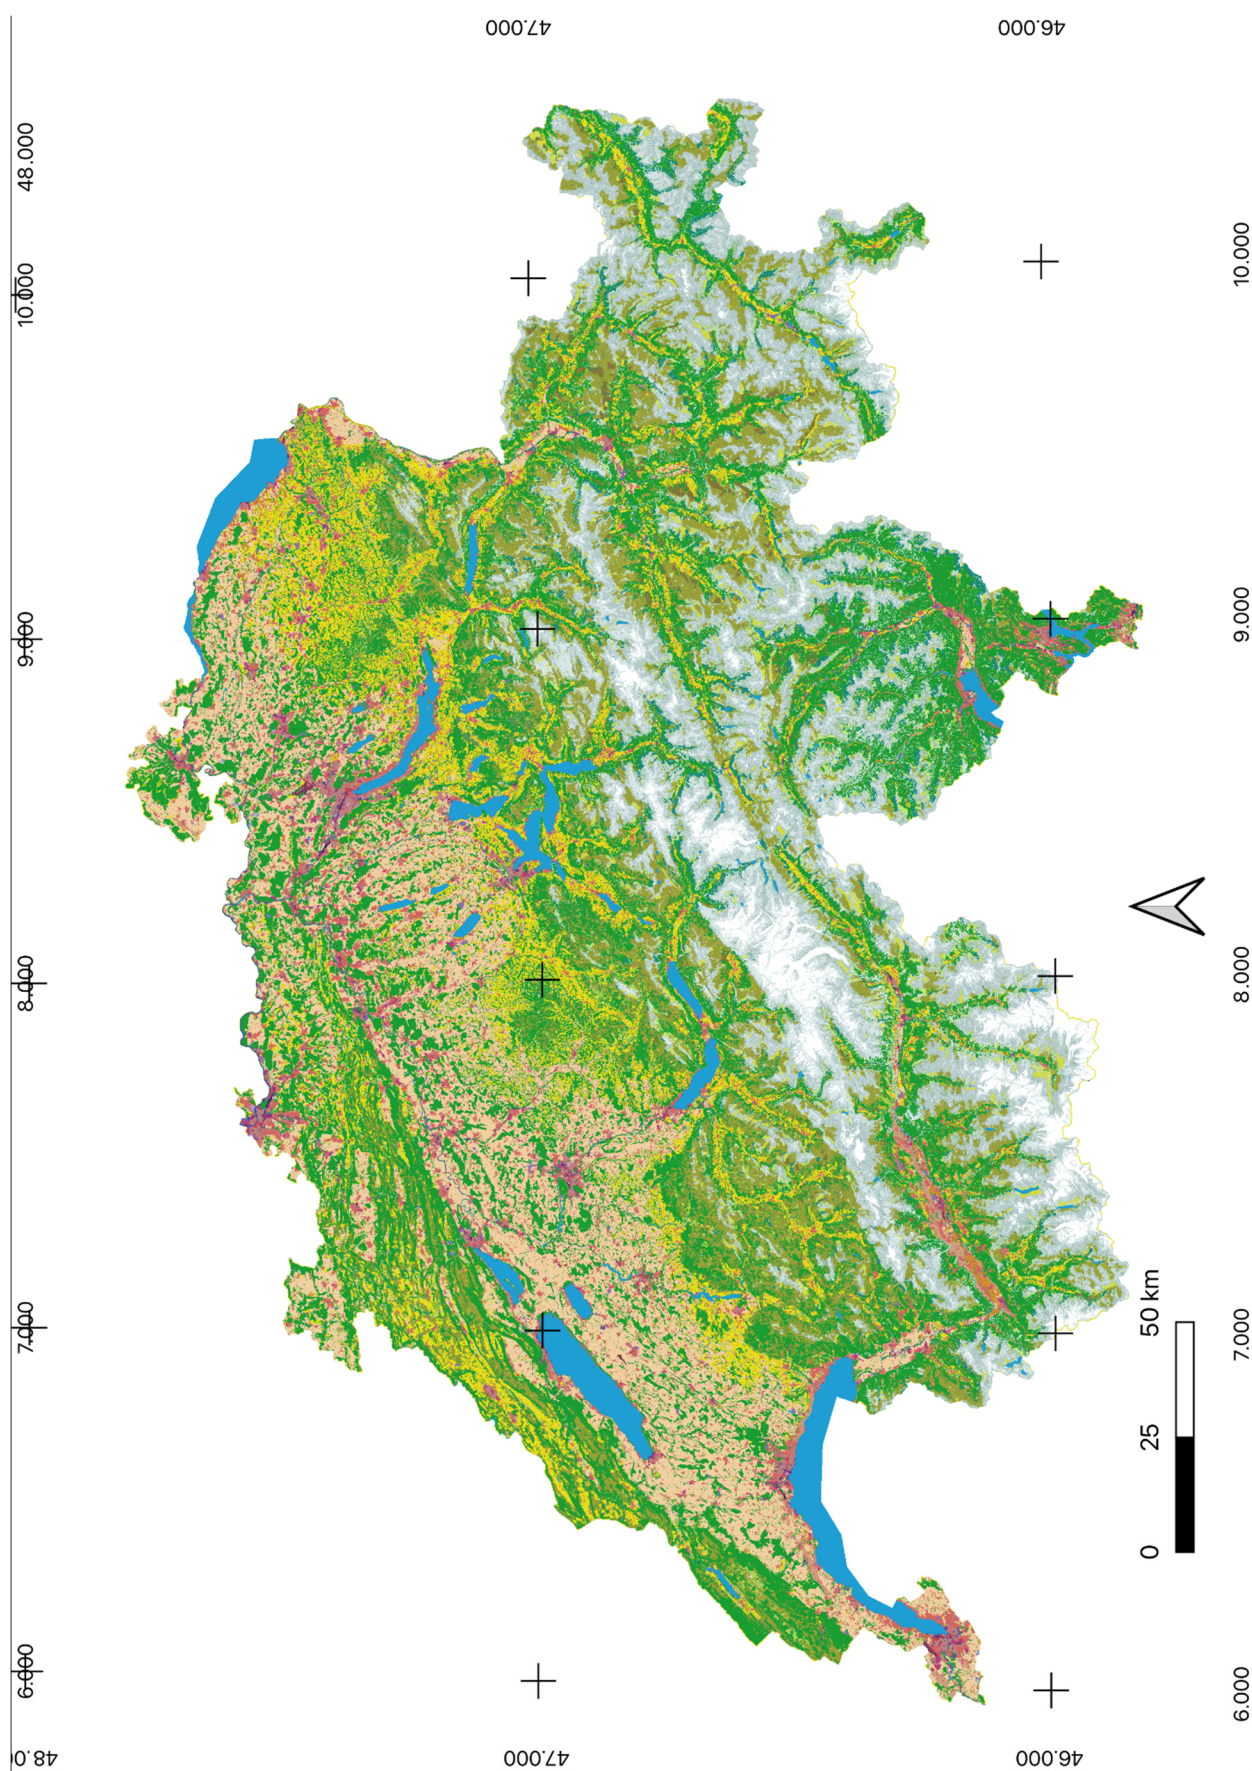

**Figure S1.** Final result of the downscaled Land Use/Land Cover at 25m for the period 2013/18.

**Table S1.** Full version of the expert table.

[illegible]

[illegible]
